# Supplementary material for: A novel explainable deep learning framework for reconstructing South Asian palaeomonsoons
Source: Copernicus journal article supplement (doi:10.5194/egusphere-2024-2128), 2024-08-09
Supplement: Supplementary file [file egusphere-2024-2128-AC1-supplement.pdf]

The authors employed deep learning models to reconstruct paleomonsoon rainfall over India, using a range of paleoclimate records and two distinct approaches: one generating spatial map time series and the other producing regional time series. They implemented Convolutional Neural Networks for the spatial maps timeseries and multilayer perceptron models for the regional time series. The authors also incorporated an ensemble modelling strategy to enhance the robustness of their predictions. Although the predictive performance was not particularly strong, they effectively used the available dataset to perform data mining, and extracted as much information as possible, and I find that their methodological approach is pretty novel. Additionally, they applied explainable machine learning techniques to identify key predictors (paleoclimate records) across different locations, and supported their findings with physical knowledge.

The methods and results were well presented and thoroughly explained, with the authors fairly acknowledging the strengths and weaknesses of their findings and providing a well-rounded discussion. The datasets produced in the study have also been made available.

I recommend publishing this work, but I have a list of minor comments that could further improve it.

We would like to thank the reviewer for their positive assessment of our manuscript, and for their detailed comments, which we respond to point-by-point in red below. Textual revisions to our manuscript will be highlighted in blue.

### Specific comments

1. When using the term "timeline models", readers might expect an architecture designed to handle time dependencies, such as recurrent neural networks or transformers. However, your MLP model does not inherently handle sequential or time-dependent data. I suggest using "regional models" to refer to MLPs, as you are applying them to predict region-based time series, and "spatial models" for the CNN models that produce spatial maps.  
**This is a very good point regarding the timeline models – indeed the MLP cannot process temporal data and so the name is misleading. We have made the suggested change to “regional model” throughout. For consistency, we have also changed instances of “CNN model” to “spatial model”, except where it is important to draw contrasts with other types of model (Section 4.2.1).**
2. Line 33: ENSO acronym not defined  
**We have fixed this.**
3. Line 35: ITCZ acronym not defined, same for PDO in Line 59 and SST in Line 99  
**We have fixed these.**
4. Line 84: ‘Machine learning approaches have been used in palaeoclimate research for automated palaeoenvironmental record generation, model post-processing’. Could you clarify what specific model is being referred to?  
**This is a header statement for the paragraph that follows (in which we give many examples of these applications). We wanted to avoid giving too much specific ML-related jargon here as each case would then require an explanation for readers**

unfamiliar with ML techniques. We thus use generic terms like “image detection”. That said, there are some sentences in this paragraph where that description is too vague, and we have corrected them accordingly:

“Nelson et al. (2021) also used machine learning to improve and extend instrumental records.” -> “Nelson et al. (2021) used a decision-tree based approach to improve and extend instrumental records”.

“Machine learning has also been used to create backward models, for example, estimating tree ring width chronologies from local environmental factors (Jevšenak et al., 2018; Bodesheim et al., 2022; Li et al., 2023).” -> “Machine learning has also been used to create backward models, for example, estimating tree ring width chronologies from local environmental factors. These have used a range of techniques including multivariate linear regression (Jevšenak et al., 2018), decision trees (Bodesheim et al., 2022), and even deep learning (Li et al., 2023).”

Same applies to ‘Machine learning has not been as widely used for model post-processing’ in Line 93. Please specify which models you are discussing to enhance clarity.

As in the previous paragraph, we wanted to keep this quite generic – and so discuss the applications rather than particular methods. However, we have added some more detail here in our revision for the interested reader:

“Machine learning has not been as widely used for model post-processing, although it has been used to improve the temporal resolution of model output using frame interpolation methods (Zheng et al., 2024), to reconstruct output variables through nonlinear mappings (Huang et al., 2020), for anomaly detection (Bianchette et al., 2023), and for identifying droughts (Coats et al., 2020).” -> “Machine learning has not been as widely used for model post-processing, although it has been used to improve the temporal resolution of model output using frame interpolation methods (Zheng et al., 2024), to reconstruct output variables through nonlinear mappings (Huang et al., 2020), for anomaly detection using a multilayer perceptron (Bianchette et al., 2023), and for identifying droughts using Markov random fields (Coats et al., 2020).”

5. Line 98: There’s a typo in byMalmgren  
Thank you, we have fixed this.
6. Line 99 and elsewhere: The term ‘simple’ MLP is not commonly used. Consider using a more standard term such as ‘basic MLP’ or just ‘MLP’  
We have changed “simple” to “basic” throughout.
7. L100: There is an extra ‘to’  
Thank you, we have fixed this.
8. Line 101: The description ‘two-layer MLP’ includes unnecessary detail. Consider simplifying it to just ‘MLP’  
Agreed, we have removed this.
9. L116: Instead of ‘to stabilize model training’ it would be better to say: ‘optimize the performance of the model’  
Agreed, we have made this change.

10. Figure 1: Are there blue contours present, or do you mean blue shades?  
Thank you for spotting this. We meant to say “filled blue contours” and have made that correction.
11. Section 2.1.4: This technical detail might be more suitable for the supplementary materials.  
Thank you for the suggestion. This is a very short subsection (~1/4 page) and it seems unnecessary to create supplementary material just to store it. We will defer this to the editor.  
  
Additionally, in point 6, please clarify the difference between the two CSV files.  
Sorry – our original wording here was unclear. We have revised this accordingly: “Metadata and the interpolated dataset were used to create two new CSV files.” -> “Two new tabular files are created, one each for the metadata and the interpolated dataset.”
12. Line 162: In ‘After this filtering, there were 157 datasets that could be used to train the models. (Fig. 1),’ please specify that these are the predictors of the models for clarity.  
We have made this change.
13. Line 203: how many years/samples were left for training?  
Thank you for pointing out this clarification. We have revised this paragraph as follows: “Therefore, to keep the bias as low as possible, the bootstrap samples for the regional models are constructed by removing a random ten-year period for testing and another random five-year period for validation. For the spatial models, each bootstrap sample has just a single test year and four validation years.” -> “Therefore, to keep the bias as low as possible, the bootstrap samples for the regional models are constructed by removing a random ten-year period for testing and another random five-year period for validation. The number of training samples then varies depending on the region, with a maximum is 167 years and a minimum of 132. For the spatial models, each bootstrap sample has just a single test year and four validation years. This leaves 90 years of training data.”
14. Line 204: These are not ‘Independent models’ since they share training data. It would be better to say ‘separate models’ or ‘distinct models’ instead.  
This is a good point. We have revised this to read “separate” in our revision.
15. Section 3.2 Regularisation: Instead of writing this as a separate section, consider combining it with the loss function section and include the equation of the loss function with the regularisation term.  
We agree and have made this change.
16. In Table 2, for clarity, update the caption to specify that L1 and L2 represent the hidden layers, and indicate the number of neurons in the input layer  
L1 actually denotes the input layer, with L2 denoting the hidden layer. We have made this clear in our revised caption.
17. Line 244: Was the choice of alpha arbitrary, or was it determined through trial and error?  
It is indeed arbitrary. As we state, what really matters for the revised loss function are the ratios beta/alpha and gamma/alpha. Two other ratios matter in training – if we were to double alpha (and beta and gamma), to achieve the same result we would also need to double lambda and halve the learning rate. However, as these values are determined

through the same hyperparameter optimisation, the choice of alpha can remain arbitrary. We have clarified this in our revision: “Values for  $\alpha$ ,  $\beta$ ,  $\gamma$  were found using a simple hyperparameter grid search. For the regional model, we use  $\alpha = 1$ ,  $\beta = 1$ , and  $\gamma = 2$ . For the CNN autoencoder model, we use  $\alpha = 1$ ,  $\beta = 0.75$ , and  $\gamma = 0.25$ . For values of  $\lambda$ , see Sec. 3.4 and Sec. 3.5 for the regional and spatial models respectively. The choice of  $\alpha$  is of course arbitrary, since it is the ratios  $\beta/\alpha$ ,  $\gamma/\alpha$ , and  $\lambda/\alpha$  that set the relative importance of the different components in the loss function. Note that to obtain the same results by doubling each of these parameters, we would need to halve the learning rate.”

18. Lines 255-258: The ‘Data Preparation’ section is unnecessary. Instead, you could include details on how the predictors were standardised or normalised, as this information is currently missing.

We agree and have removed this subsection in our revision. As requested, we have added a new bullet point on data preprocessing: “Standardise the training data. Rescale each predictor in the training data to have a minimum of 0 and a maximum of 1 using min-max scaling. Then apply the same scaling parameters to the validation and test sets. For precipitation, normalise the training data to have a mean of 0 and a standard deviation of 1, and apply the same normalisation to the validation and test sets.”

19. Figure 2: Where is the monsoon core zone?

This is leftover from a previous version of the manuscript and should read NCI (north central India). We have corrected this in the revision. We use the term later in our analysis, and now add a description: “In 1926, the wet anomaly is located over east central India, as opposed to the whole monsoon core zone (west, central and north India, excluding mountains) in the observations.”

20. Lines 285-290: Instead of detailing how CNNs are typically used as encoders, focus on explaining your specific approach; starting with dense layers and then using CNN as a decoder, as mentioned in Line 290.

Thank you for the suggestion. Here, we wanted to give a brief overview of how CNNs work for readers who may not be familiar with them. We would prefer to retain this and will defer to the editor. However, we have added more detail on how transposed CNN layers work: “Specifically, transposed convolutional layers reverse the downsampling effect of standard convolutions by inserting zeros between input elements or adjusting strides, allowing the filters to produce outputs with larger spatial dimensions and reconstruct higher-resolution feature maps from lower-dimensional data.” The next paragraph then begins by explaining the structure of the spatial network, starting with the dense layers.

21. Line 325: The term ‘distribution mean’ may not be accurate. It would be clearer to say ‘the mean of all predictions.’

We have made this change.

22. In the caption of Figure 3: ‘Observed values taken from the reconstructed time series in Sontakke et al. (2008) are given in green’. Do you mean the observed values are shown to the right of the green line?

Correct, this referred to a previous version of the figure. We have now fixed this.

23. Line 367: The term ‘pattern correlation’ is ambiguous as it could refer to either ‘temporal’ or ‘spatial’ correlation. Please specify that this refers to ‘spatial’ correlation for clarity.  
Thank you for this suggestion. We have made this change here and throughout our revised manuscript.

24. Figure 5 caption: Please revise the sentence ‘the prediction from with the PCC is computed is taken’ for clarity.  
Thank you – we have revised this to: “For the spatial models, the PCC is computed over the ensemble mean of members that were not trained on the year in question.”

Additionally, ensure consistency between ‘CNN-ERA5’ in the caption and ‘ERA5-CNN’ mentioned in Line 385.

Thank you for spotting this, now corrected.

25. Figure 7 caption: There is no dotted black line as mentioned; instead, there is a single dotted green line. Please correct the caption to reflect that it is one dotted green line, not ‘green lines’.  
Thank you, we have fixed the caption to refer to the dashed green line (which again referred to an older version of this figure). Although the black line in (c) is dotted, this is not obvious in the manuscript version of the figure and so we replace “dotted” with “thin”.

26. Line 455: Are you referring to low ‘temporal’ resolution?  
Yes, we have clarified this in the revision.

27. Figure 8: How were the Shapley values standardised?  
The “standardised” here refers to the fact that the precipitation data are standardised before training and are not subsequently converted back to their original values. Therefore, the Shapley values apply to this standardised dataset, which we now explain in our revised caption: “The Shapley values are standardised in the sense that a value of 0.1 means that on average, the selected dataset changes the predicted value of standardised seasonally-averaged monsoon precipitation in the given regional model by 0.1.”

Also, did you take the absolute values of the Shapley values before averaging them? Please add these details for clarity.

Yes, that’s correct. We’ve added this in the revised caption.
